# Supplementary material
Source: Research Square preprint supplement (doi:10.21203/rs.3.rs-9693346/v1)

**Biodiversity Co-benefits of Land Sparing and Land Sharing Strategies for Tiger Conservation in Central India**

Kamana Pokhariya, Ajay Singh, Supratim Dutta, Zainab Khan, Ramesh Krishnamurthy*

Wildlife Institute of India, Post Box #18, Chandrabani, Dehradun 248001, Uttarakhand, India

*Corresponding author: Ramesh Krishnamurthy, Address: Wildlife Institute of India, Chandrabani, Dehradun 248001, Uttarakhand, India. E-mail address: [ramesh@wii.gov.in](mailto:ramesh@wii.gov.in)

**Online Resource 1** Land use land cover class description

| **Class** | **Description** |
| --- | --- |
| Dense forest | Tree canopy density over 50% |
| Open forest | Tree canopy density between 10-50% |
| Scrub land | Area with sparse tree and shrub distribution with understory grass cover |
| Water | Rivers, lakes, and other drainages |
| Cropland/Agriculture | All kinds of cultivated lands |
| Bare land | Area covered by bare rock, soil and sand |

**Online Resource 2** Description of change classes created using LULC in 1989 and 2019

| **Class** | **Description** |
| --- | --- |
| Forest remains same | Unchanged forested areas during the study duration |
| Non-forest remains same | Unchanged non-forested areas during the study duration |
| Forest gain | Conversion of open to dense forest and other classes to open forest |
| Forest degradation | Conversion of dense to open forest/scrubland and open forest to scrubland |
| Cropland to scrubland | Conversion of cropland to scrubland or grassland |
| Other changes | All other changes in non-forested classes |

**Online Resource 3** Occurrence data points for bird, mammal, and tree species


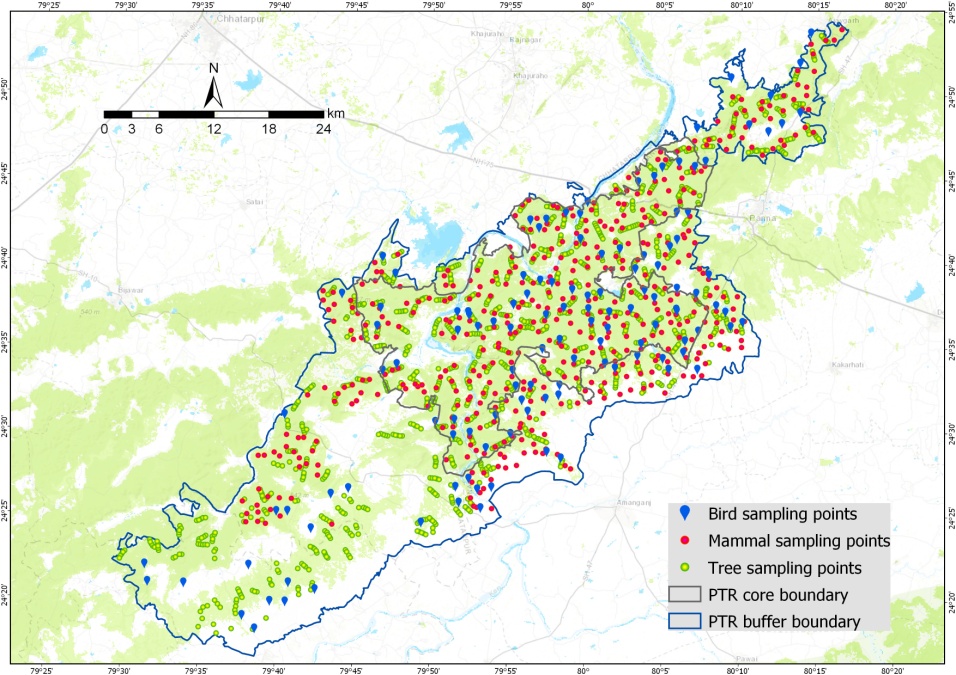


**Online Resource 4** Decadal LULC patterns in Panna tiger reserve from year 1989 to 2019

**Online Resource 5** Class-wisearea changed from the year 1989 to 2019

| **Area changed (km2)** | | | |
| --- | --- | --- | --- |
| **LULC class** | **PTR** | **Core** | **Buffer** |
| Dense forest | 365.68 | 182.09 | 183.59 |
| Open forest | -162.1 | -104.64 | -57.46 |
| Scrub land | -235.16 | -69.84 | -165.32 |
| Water body | 8.89 | 5.14 | 2.75 |
| Cropland/Agriculture | -29.65 | -12.49 | -17.16 |
| Bare land | 52.3 | -0.07 | 52.37 |

**Online Resource 6** Evaluation statistics (means, n = 3) for each ensemble model generated using Biomod 2 package in R environment

| **Taxa: Bird** | | | | | | | |
| --- | --- | --- | --- | --- | --- | --- | --- |
| **Sr. No.** | **Species** | **TSS** | **ROC** | **Sr. No.** | **Species** | **TSS** | **ROC** |
| 1 | *Acridotheres tristis* | 0.533 | 0.83 | 20 | *Megalaima zeylanica* | 0.549 | 0.841 |
| 2 | *Centropus parroti* | 0.516 | 0.825 | 21 | *Merops orientalis* | 0.552 | 0.841 |
| 3 | *Copsychus saularis* | 0.542 | 0.836 | 22 | *Orthotomus sutorius* | 0.542 | 0.839 |
| 4 | *Coracias benghalensis* | 0.537 | 0.835 | 23 | *Parus cinereus* | 0.51 | 0.819 |
| 5 | *Corvus macrorhynchos* | 0.511 | 0.823 | 24 | *Pavo cristatus* | 0.554 | 0.844 |
| 6 | *Dendrocitta vagabunda* | 0.534 | 0.832 | 25 | *Phoenicurus ochruros* | 0.532 | 0.828 |
| 7 | *Dicrurus caerulescens* | 0.521 | 0.814 | 26 | *Prinia inornata* | 0.536 | 0.835 |
| 8 | *Dicrurus macrocercus* | 0.513 | 0.823 | 27 | *Psittacula cyanocephala* | 0.561 | 0.849 |
| 9 | *Dinopium benghalense* | 0.537 | 0.834 | 28 | *Psittacula krameri* | 0.522 | 0.815 |
| 10 | *Elanus caeruleus* | 0.51 | 0.811 | 29 | *Pycnonotus cafer* | 0.55 | 0.843 |
| 11 | *Eremopterix griseus* | 0.524 | 0.812 | 30 | *Rhipidura aureola* | 0.518 | 0.827 |
| 12 | *Ficedula parva* | 0.552 | 0.842 | 31 | *Saxicoloides fulicatus* | 0.537 | 0.833 |
| 13 | *Francolinus pondicerianus* | 0.546 | 0.84 | 32 | *Spilopelia chinensis* | 0.543 | 0.839 |
| 14 | *Gymnoris xanthocollis* | 0.531 | 0.825 | 33 | *Spilopelia senegalensis* | 0.517 | 0.824 |
| 15 | *Gyps indicus* | 0.538 | 0.837 | 34 | *Streptopelia decaocto* | 0.535 | 0.836 |
| 16 | *Halcyon smyrnensis* | 0.512 | 0.822 | 35 | *Sturnia pagodarum* | 0.529 | 0.824 |
| 17 | *Iduna caligata* | 0.519 | 0.825 | 36 | *Treron phoenicoptera* | 0.513 | 0.812 |
| 18 | *Lanius schach* | 0.521 | 0.817 | 37 | *Turdoides striata* | 0.521 | 0.816 |
| 19 | *Lanius vittatus* | 0.532 | 0.827 | 38 | *Vanellus indicus* | 0.511 | 0.812 |
| **Taxa: Mammal** | | | | | | | |
| 39 | *Axis axis* | 0.681 | 0.875 | 52 | *Macaca mulatta* | 0.546 | 0.864 |
| 40 | *Boselaphus tragocamelus* | 0.621 | 0.865 | 53 | *Mellivora capensis* | 0.513 | 0.812 |
| 41 | *Canis aureus* | 0.594 | 0.874 | 54 | *Melursus ursinus* | 0.576 | 0.868 |
| 42 | *Canis lupus pallipes* | 0.548 | 0.818 | 55 | *Panthera pardus* | 0.67 | 0.874 |
| 43 | *Cuon alpinus* | 0.527 | 0.812 | 56 | *Panthera tigris* | 0.65 | 0.891 |
| 44 | *Felis chaus* | 0.519 | 0.829 | 57 | *Paradoxurus hermaphroditus* | 0.547 | 0.865 |
| 45 | *Felis silvestris ornata* | 0.517 | 0.825 | 58 | *Rusa unicolor* | 0.581 | 0.874 |
| 46 | *Gazella bennettii* | 0.574 | 0.868 | 59 | *Semnopithecus* | 0.564 | 0.862 |
| 47 | *Herpestes edwardsii* | 0.531 | 0.842 | 60 | *Sus scrofa* | 0.571 | 0.867 |
| 48 | *Herpestes smithii* | 0.539 | 0.851 | 61 | *Tatera indica* | 0.514 | 0.837 |
| 49 | *Hyaena hyaena* | 0.576 | 0.869 | 62 | *Tetracerus quadricornis* | 0.512 | 0.813 |
| 50 | *Hystrix indica* | 0.587 | 0.873 | 63 | *Viverricula indica* | 0.545 | 0.852 |
| 51 | *Lepus nigricollis* | 0.579 | 0.872 | 64 | *Vulpes bengalensis* | 0.583 | 0.869 |
| **Taxa: Tree** | | | | | | | |
| 65 | *Acacia catechu* | 0.589 | 0.838 | 85 | *Lagerstroemia parviflora* | 0.641 | 0.844 |
| 66 | *Acacia leucophloea* | 0.538 | 0.823 | 86 | *Lannea coromandelica* | 0.67 | 0.89 |
| 67 | *Aegle marmelos* | 0.681 | 0.901 | 87 | *Madhuca longifolia* | 0.571 | 0.835 |
| 68 | *Albizia procera* | 0.561 | 0.829 | 88 | *Miliusa tomentosa* | 0.542 | 0.816 |
| 69 | *Anogeissus latifolia* | 0.642 | 0.845 | 89 | *Mitragyna parvifolia* | 0.591 | 0.839 |
| 70 | *Anogeissus pendula* | 0.648 | 0.861 | 90 | *Naringi crenulata* | 0.551 | 0.825 |
| 71 | *Bauhinia racemosa* | 0.635 | 0.847 | 91 | *Nyctanthes arbor-tristis* | 0.514 | 0.804 |
| 72 | *Bombax ceiba* | 0.522 | 0.809 | 92 | *Phyllanthus emblica* | 0.542 | 0.815 |
| 73 | *Boswellia serrata* | 0.658 | 0.88 | 93 | *Pterocarpus marsupium* | 0.581 | 0.836 |
| 74 | *Bridelia retusa* | 0.524 | 0.809 | 94 | *Schleichera oleosa* | 0.521 | 0.807 |
| 75 | *Buchanania cochinchinensis* | 0.656 | 0.878 | 95 | *Soymida febrifuga* | 0.548 | 0.821 |
| 76 | *Butea monosperma* | 0.546 | 0.818 | 96 | *Sterculia urens* | 0.532 | 0.81 |
| 77 | *Ceriscoides turgida* | 0.513 | 0.804 | 97 | *Tectona grandis* | 0.614 | 0.842 |
| 78 | *Diospyros melanoxylon* | 0.55 | 0.824 | 98 | *Terminalia arjuna* | 0.548 | 0.813 |
| 79 | *Flacourtia indica* | 0.533 | 0.81 | 99 | *Terminalia bellirica* | 0.547 | 0.818 |
| 80 | *Gardenia latifolia* | 0.519 | 0.802 | 100 | *Terminalia elliptica* | 0.609 | 0.84 |
| 81 | *Grewia orbiculata* | 0.584 | 0.837 | 101 | *Wrightia arborea* | 0.635 | 0.845 |
| 82 | *Haldina cordifolia* | 0.521 | 0.807 | 102 | *Ziziphus mauritiana* | 0.59 | 0.839 |
| 83 | *Holoptelea integrifolia* | 0.562 | 0.831 | 103 | *Ziziphus xylopyrus* | 0.643 | 0.843 |
| 84 | *Kydia calycina* | 0.51 | 0.801 |  |  |  |  |

**Online Resource 7** Alpha diversity values for Trees, Birds and Mammals in PTR


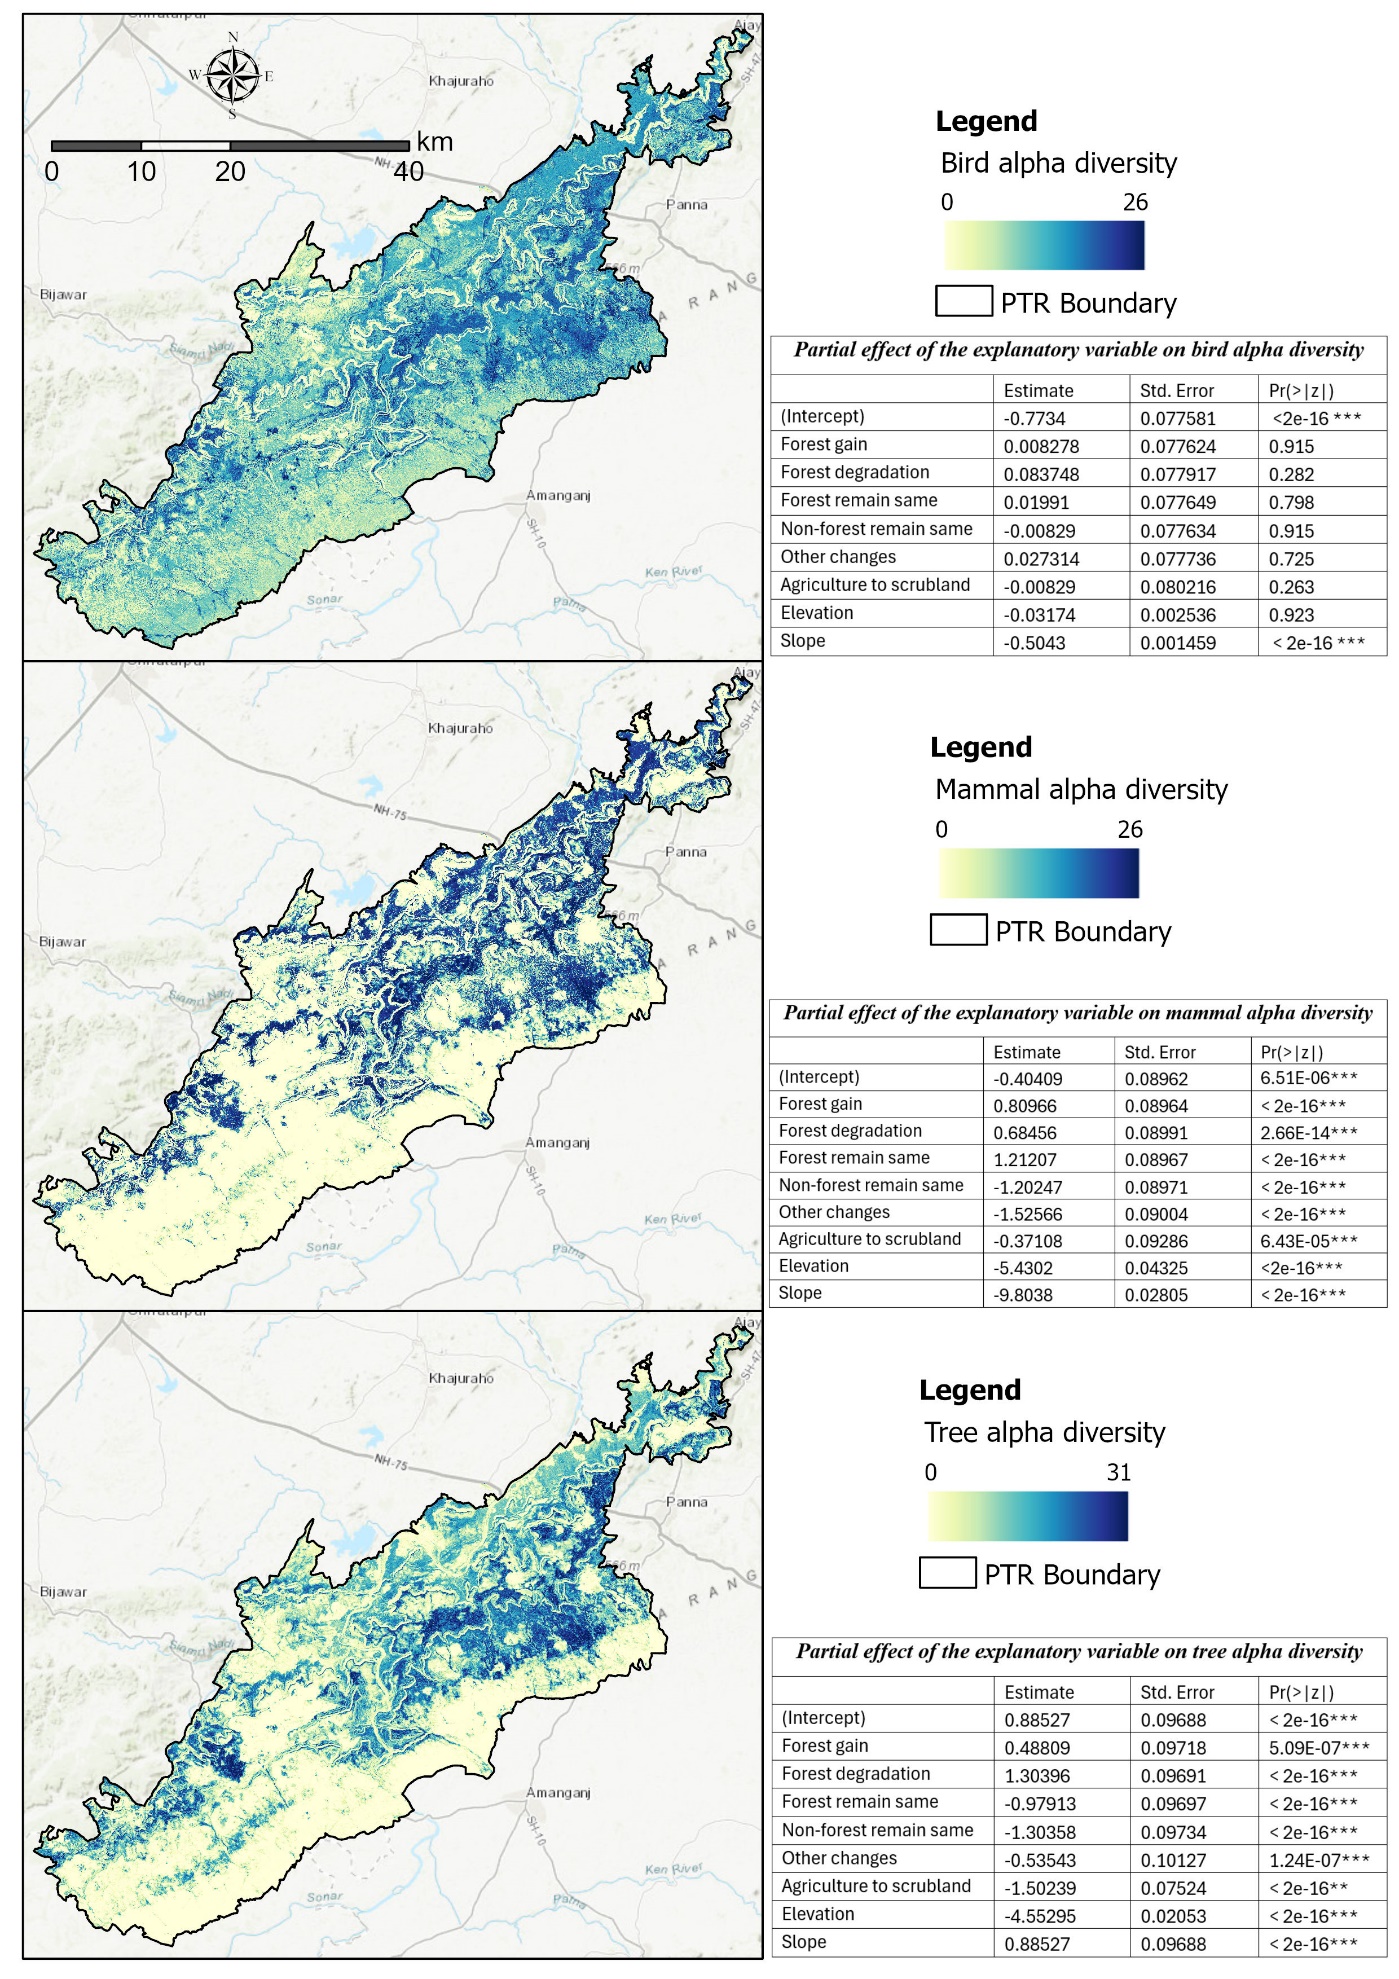

Supplement: Supplementary file 1 [file 9057c80e04cc7227d82a14bd.docx]
